# Supplementary material for: Thermoresponsive polysarcosine-based nanoparticles
Source: Royal Society of Chemistry journal article supplement (doi:10.1039/c9tb00588a), 2019-01-01
Supplement: c9tb00588a1.pdf [file c9tb00588a1.pdf]

### Supporting Information: Thermoresponsive Polysarcosine-Based Nanoparticles

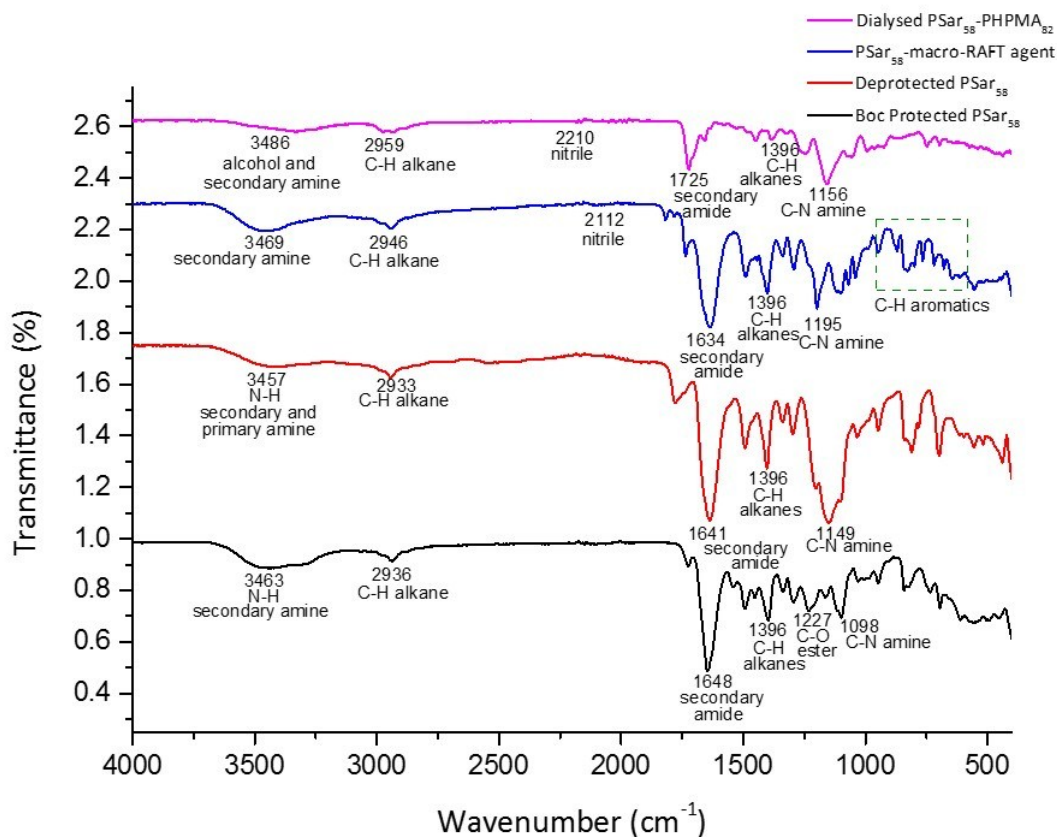

**Figure S1.** FTIR spectra of Boc protected PSar<sub>58</sub>, deprotected PSar<sub>58</sub>, PSar<sub>58</sub>-macro-RAFT agent and dialysed PSar<sub>58</sub>-PHPMA<sub>82</sub>.

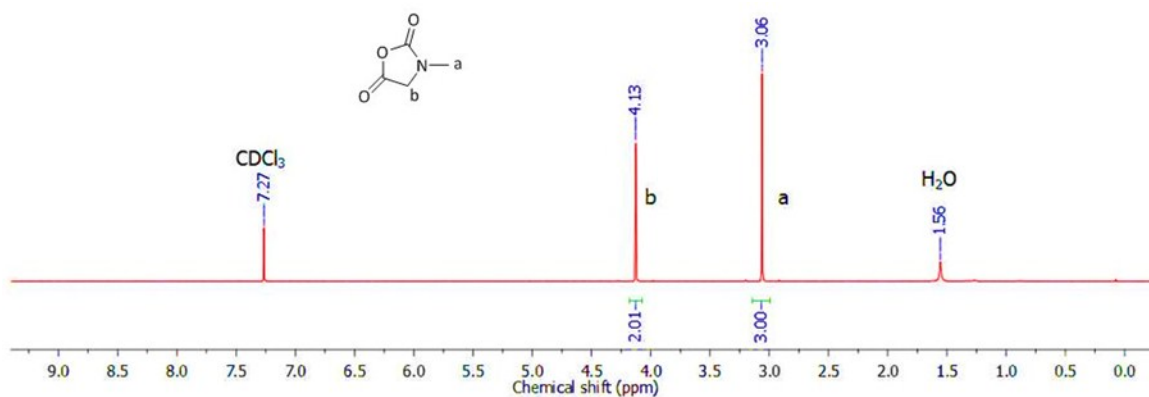

**Figure S2.** <sup>1</sup>H NMR spectrum corresponding to sarcosine NCA. DMSO-d<sub>6</sub>.

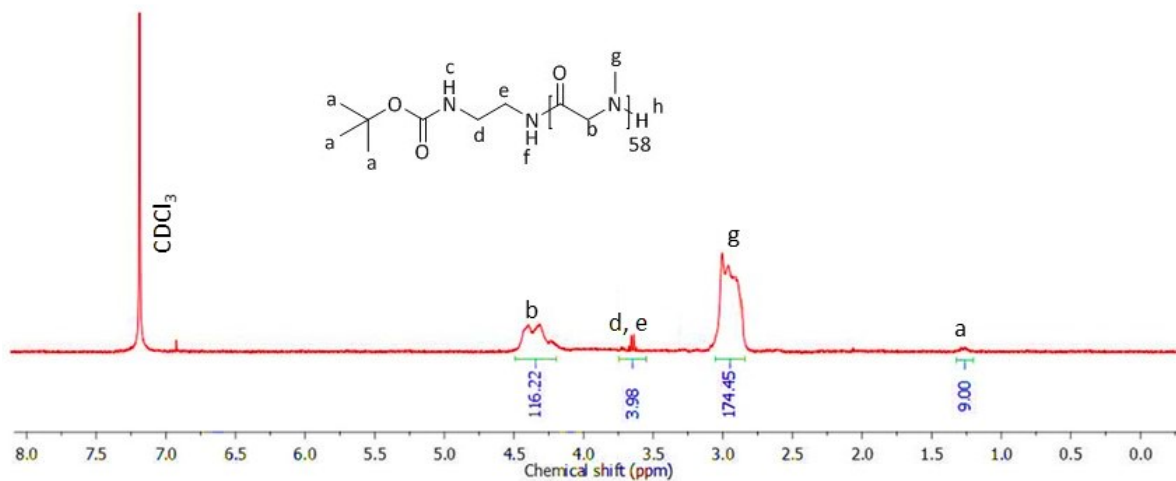

**Figure S3.** <sup>1</sup>H NMR spectrum corresponding to Boc-protected PSar<sub>58</sub>. DMSO-d<sub>6</sub>.

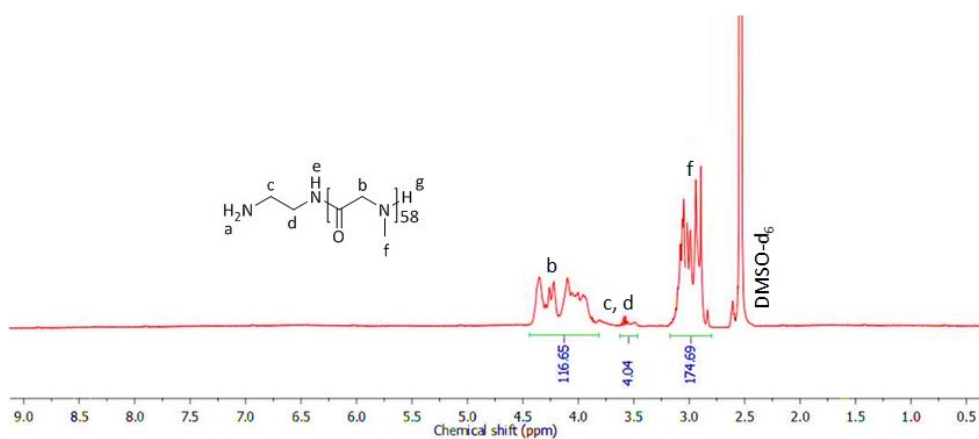

**Figure S4.** <sup>1</sup>H NMR spectrum corresponding to PSar<sub>58</sub>. DMSO-d<sub>6</sub>.

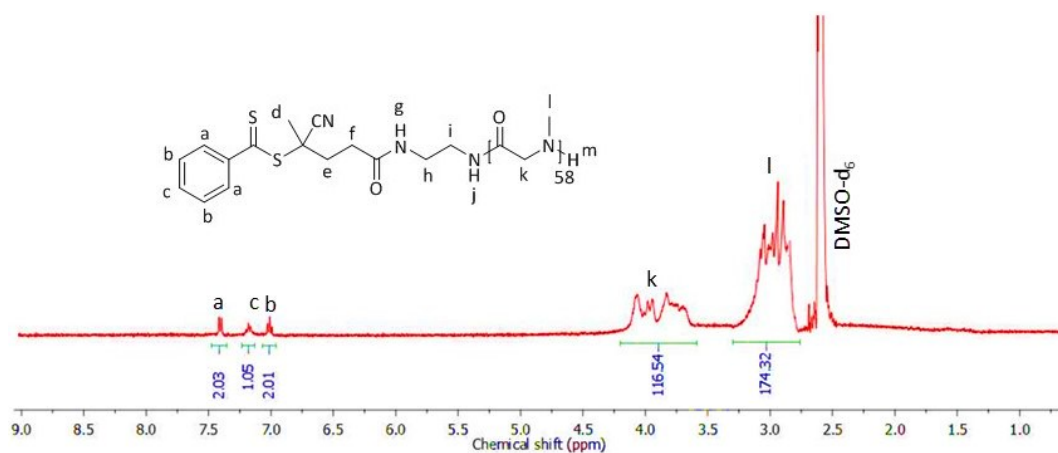

**Figure S5.** <sup>1</sup>H NMR spectrum corresponding to SCPDB-conjugated PSar<sub>58</sub>. DMSO-d<sub>6</sub>.

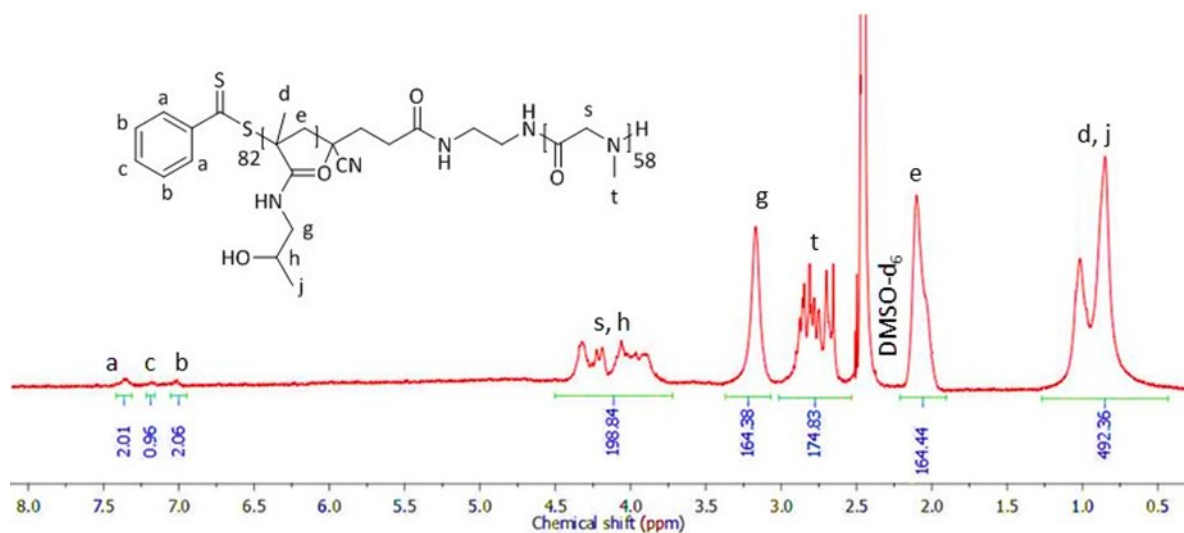

**Figure S6.** <sup>1</sup>H NMR spectrum corresponding to PSar<sub>58</sub>-b-PHPMA<sub>82</sub>. DMSO-d<sub>6</sub>.

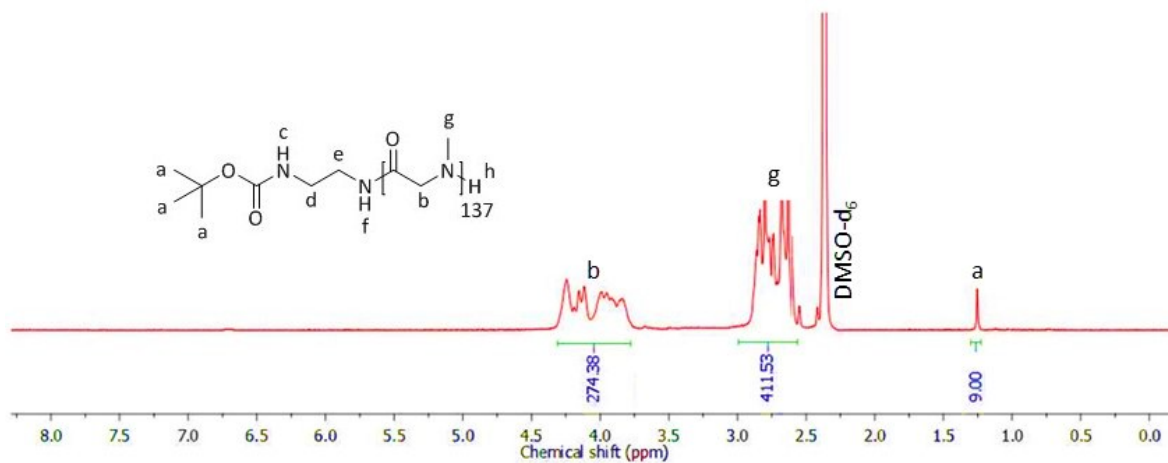

**Figure S7.** <sup>1</sup>H NMR spectrum corresponding to Boc-protected PSar<sub>137</sub>. DMSO-d<sub>6</sub>.

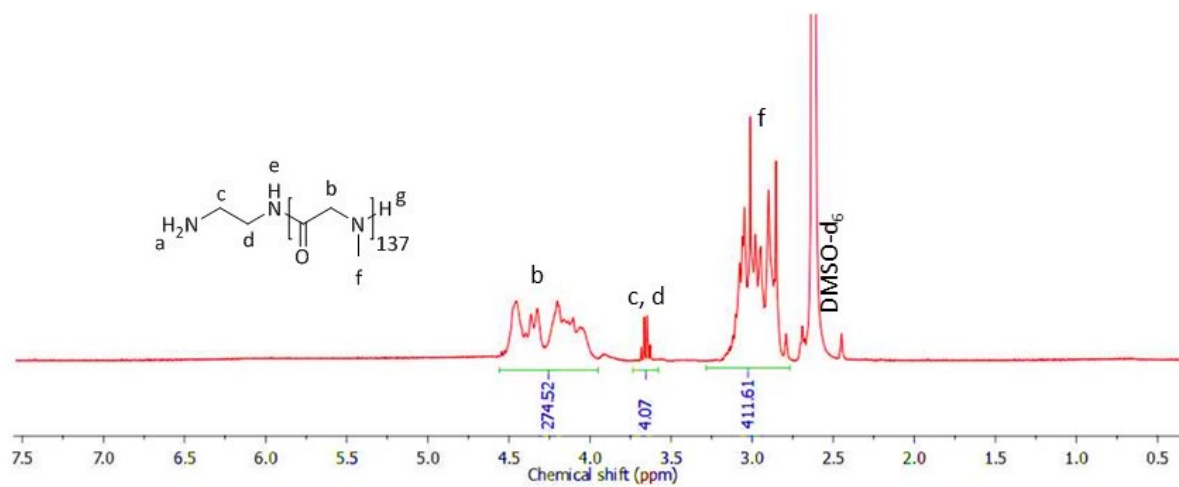

**Figure S8.** <sup>1</sup>H NMR spectrum corresponding to PSar<sub>137</sub>. DMSO-d<sub>6</sub>.

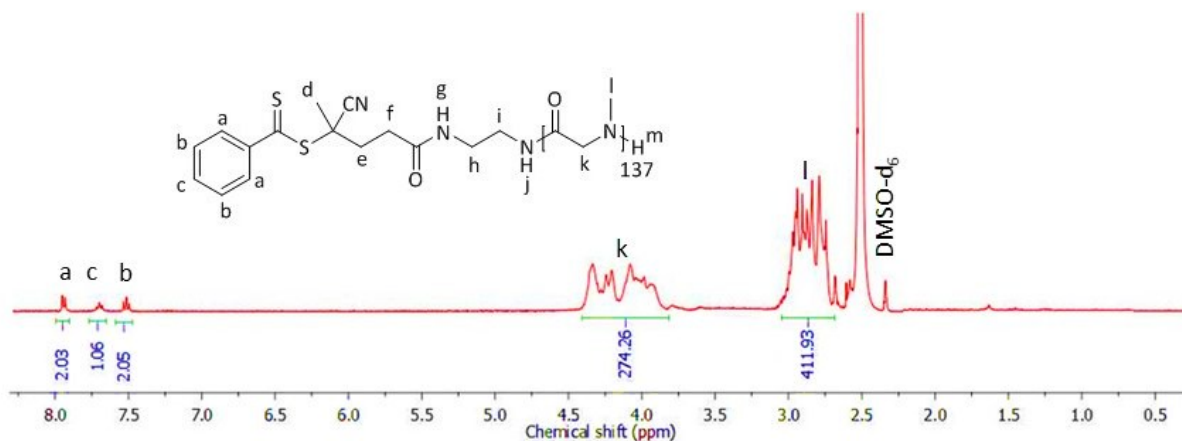

**Figure S9.** <sup>1</sup>H NMR spectrum corresponding to SCPDB-conjugated PSar<sub>137</sub>. DMSO-d<sub>6</sub>.

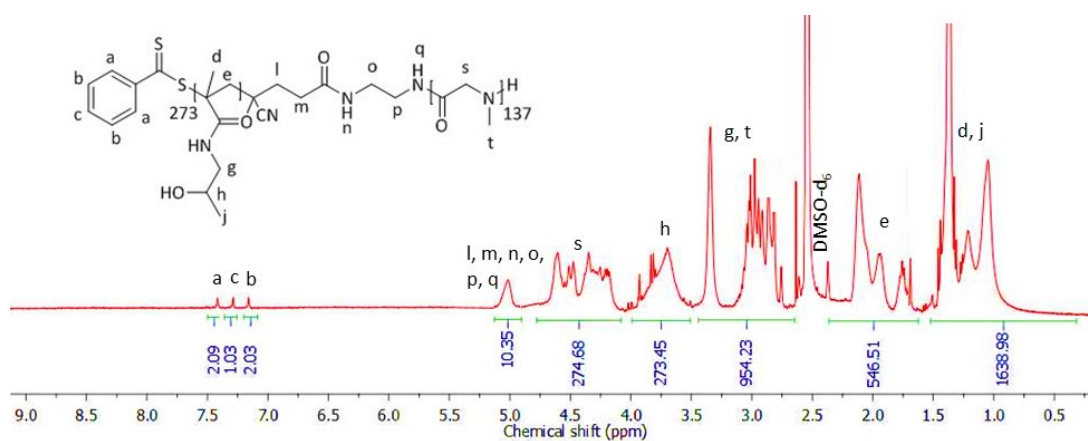

**Figure S10.** <sup>1</sup>H NMR spectrum corresponding to PSar<sub>137</sub>-*b*-PHPMA<sub>273</sub>. DMSO-d<sub>6</sub>.

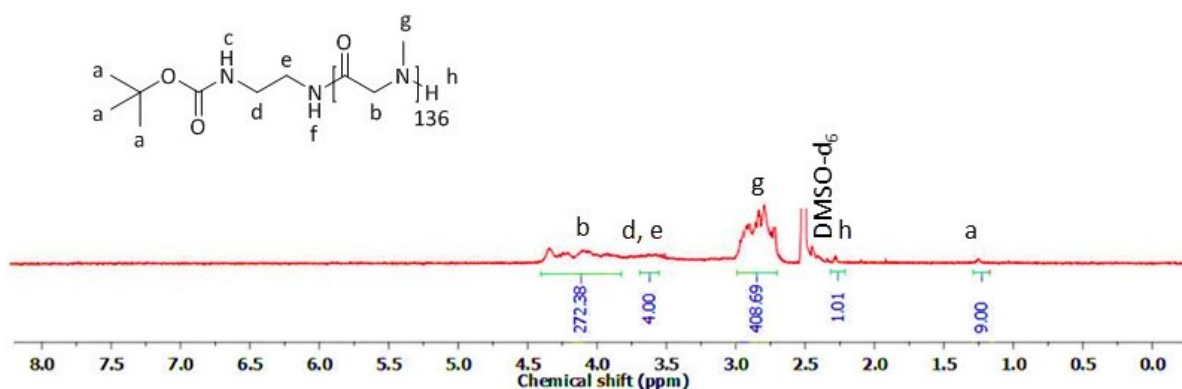

**Figure S11.** <sup>1</sup>H NMR spectrum corresponding to Boc-protected PSar<sub>136</sub>. DMSO-d<sub>6</sub>.

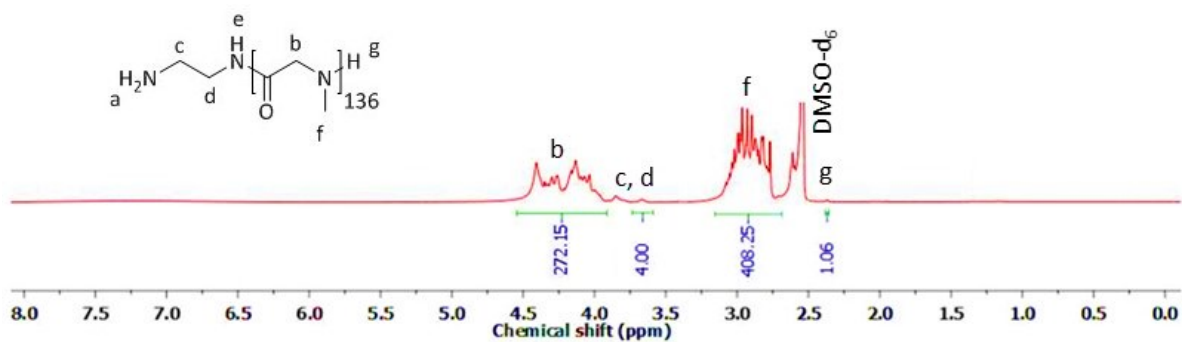

**Figure S12.** <sup>1</sup>H NMR spectrum corresponding to PSar<sub>136</sub>. DMSO-d<sub>6</sub>.

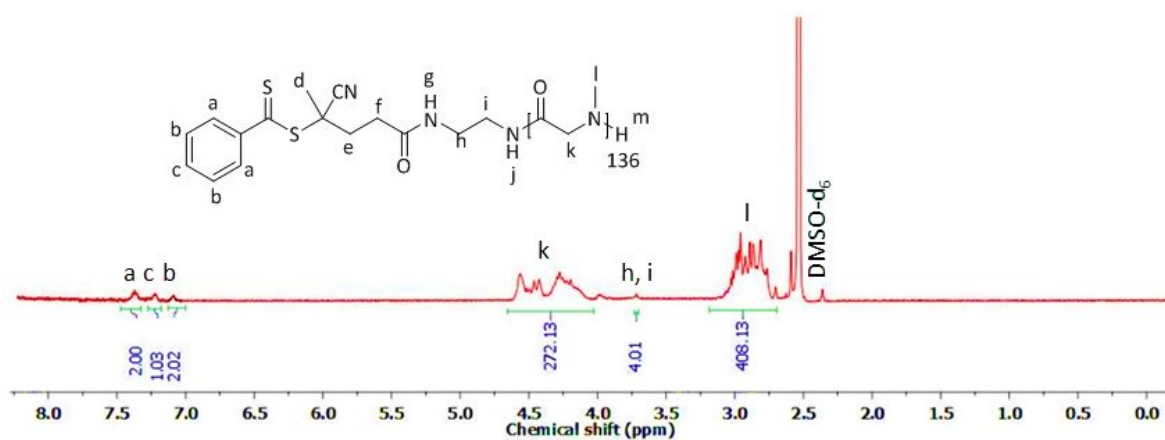

**Figure S13.** <sup>1</sup>H NMR spectrum corresponding to SCPDB-conjugated PSar<sub>136</sub>. DMSO-d<sub>6</sub>.

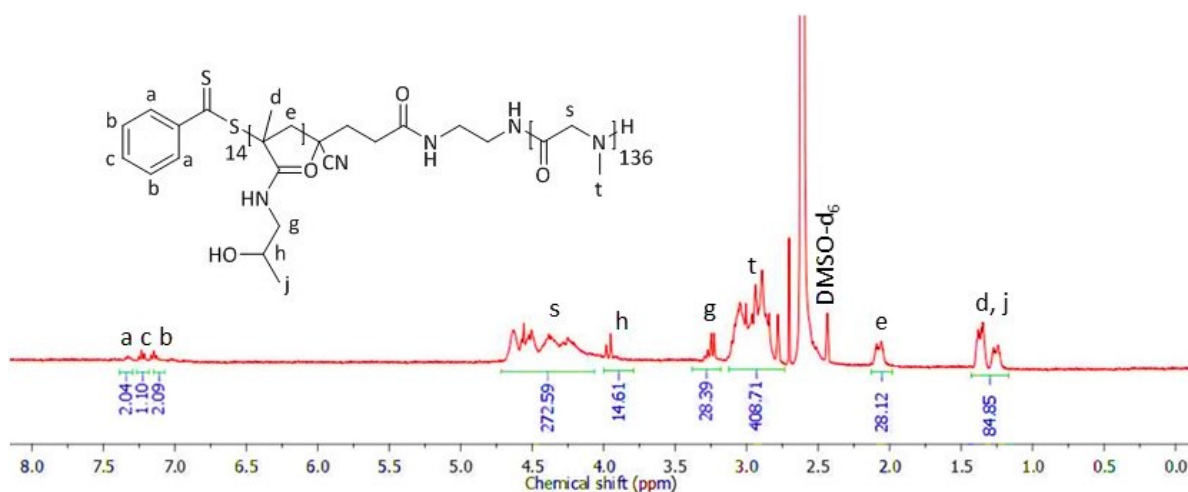

**Figure S14.** <sup>1</sup>H NMR spectrum corresponding to PSar<sub>136</sub>-b-PHPMA<sub>14</sub>. DMSO-d<sub>6</sub>.

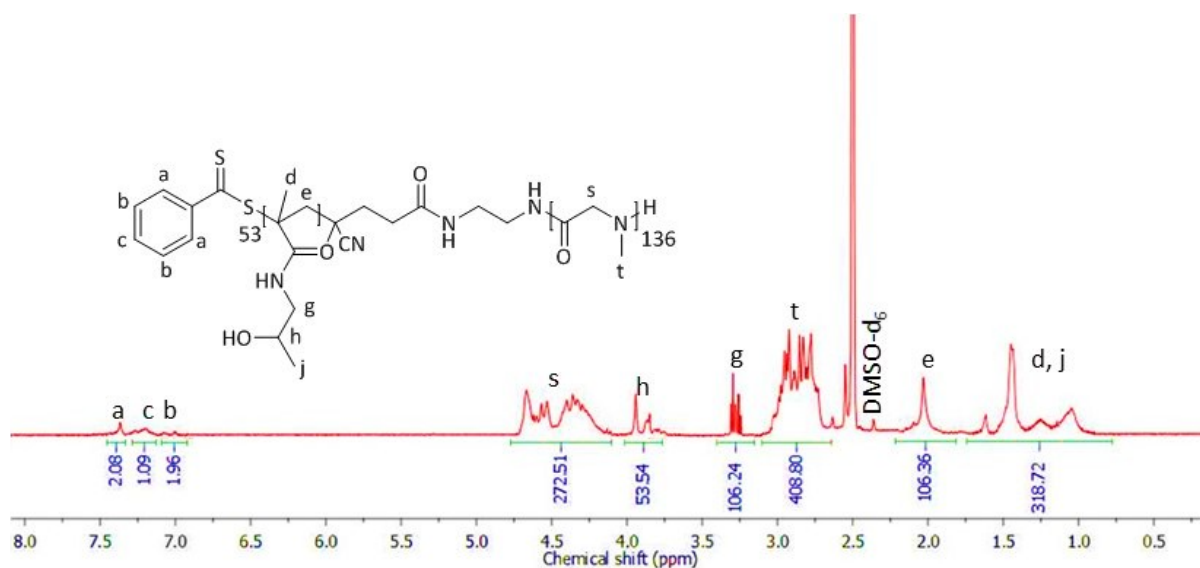

Figure S15. <sup>1</sup>H NMR spectrum corresponding to PSar<sub>136</sub>-b-PHPMA<sub>53</sub>. DMSO-d<sub>6</sub>.

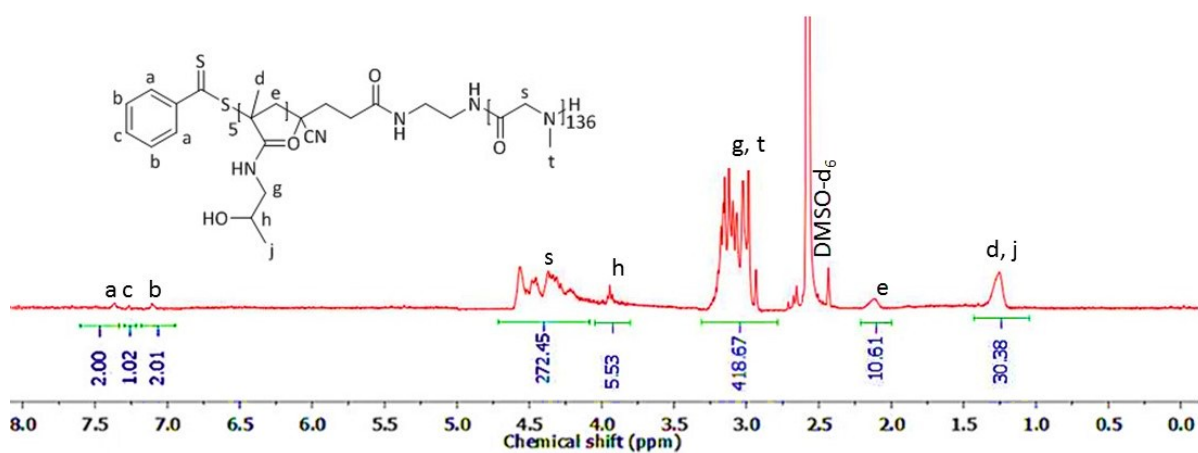

Figure S16. <sup>1</sup>H NMR spectrum corresponding to PSar<sub>136</sub>-b-PHPMA<sub>5</sub>. DMSO-d<sub>6</sub>.

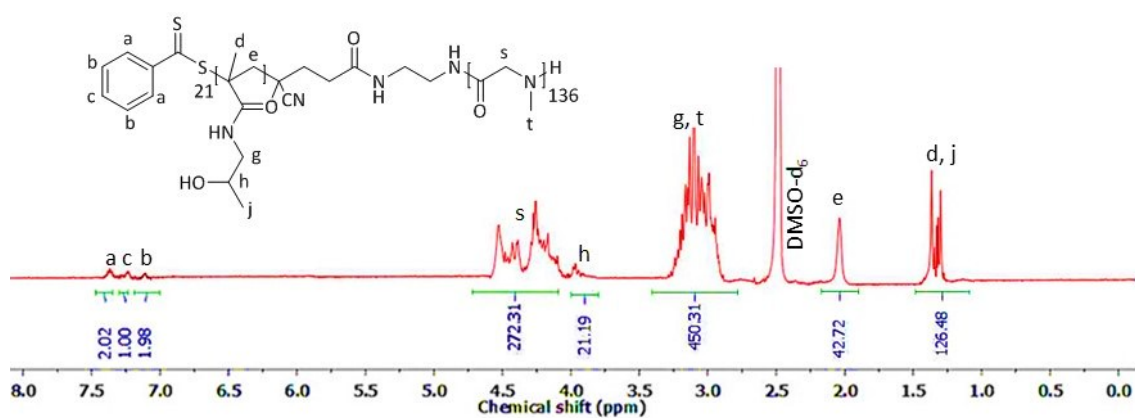

Figure S17. <sup>1</sup>H NMR spectrum corresponding to PSar<sub>136</sub>-b-PHPMA<sub>21</sub>. DMSO-d<sub>6</sub>.

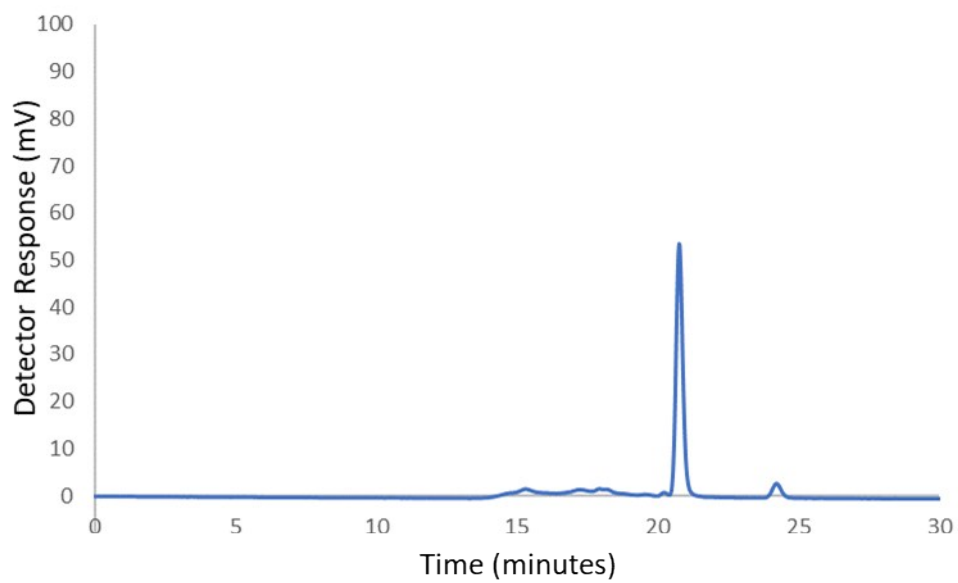

**Figure S18.** GPC chromatogram corresponding to PSar<sub>136</sub>-*b*-PHPMA<sub>5</sub>.

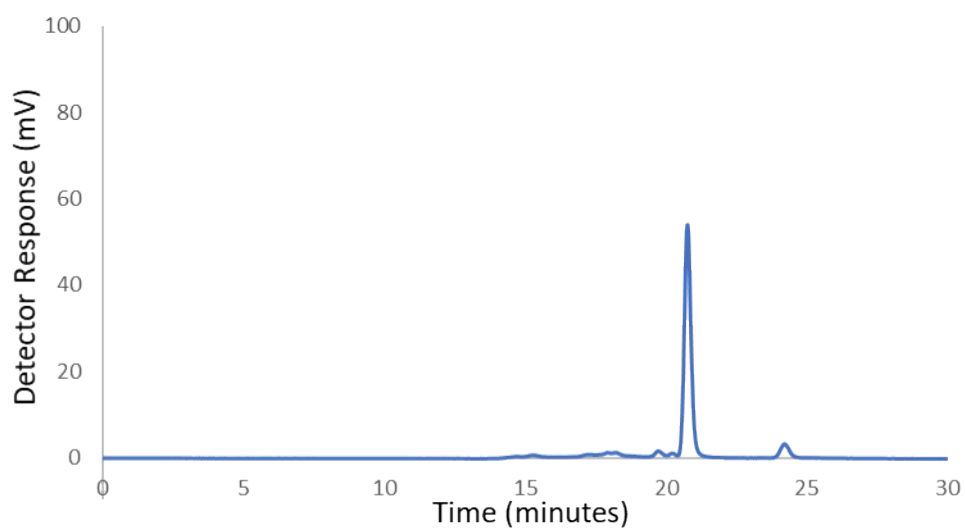

**Figure S19.** GPC chromatogram corresponding to PSar<sub>136</sub>-*b*-PHPMA<sub>21</sub>.

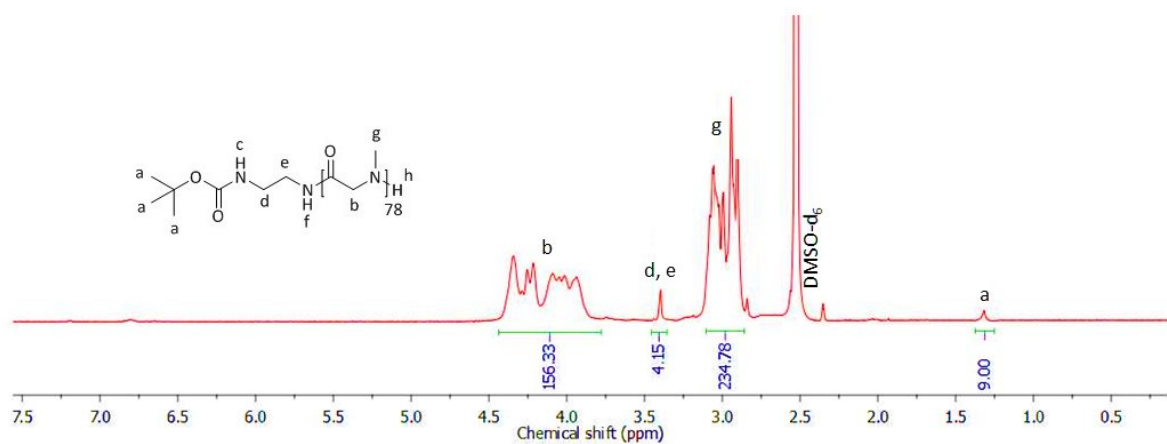

**Figure S20.** <sup>1</sup>H-NMR corresponding to Boc-protected PSar<sub>78</sub>. DMSO-d<sub>6</sub>.

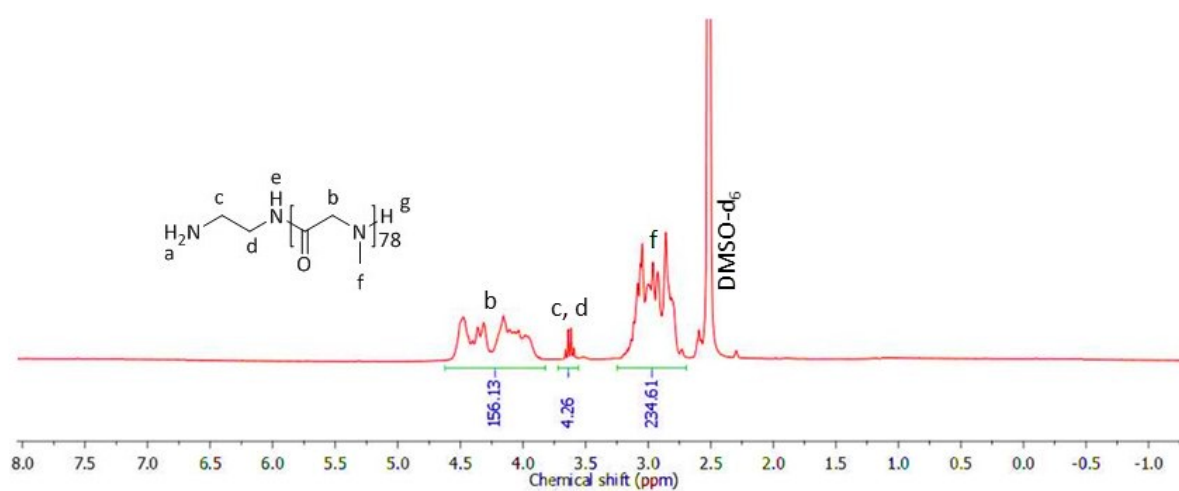

**Figure 21.** <sup>1</sup>H-NMR corresponding to PSar<sub>78</sub>. DMSO-d<sub>6</sub>.

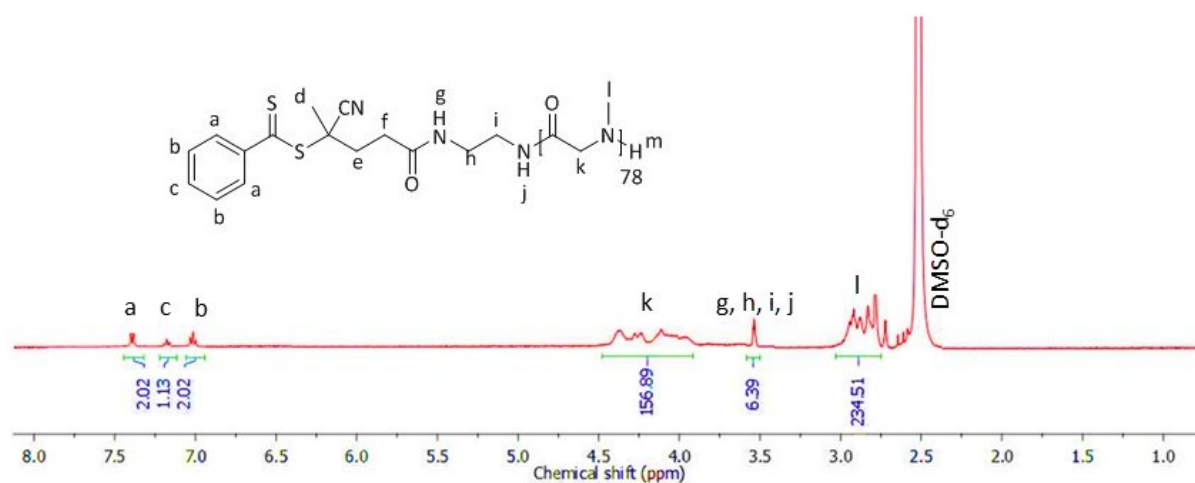

**Figure 22.** <sup>1</sup>H-NMR corresponding to SCPDB-conjugated PSar<sub>78</sub>. DMSO-d<sub>6</sub>.



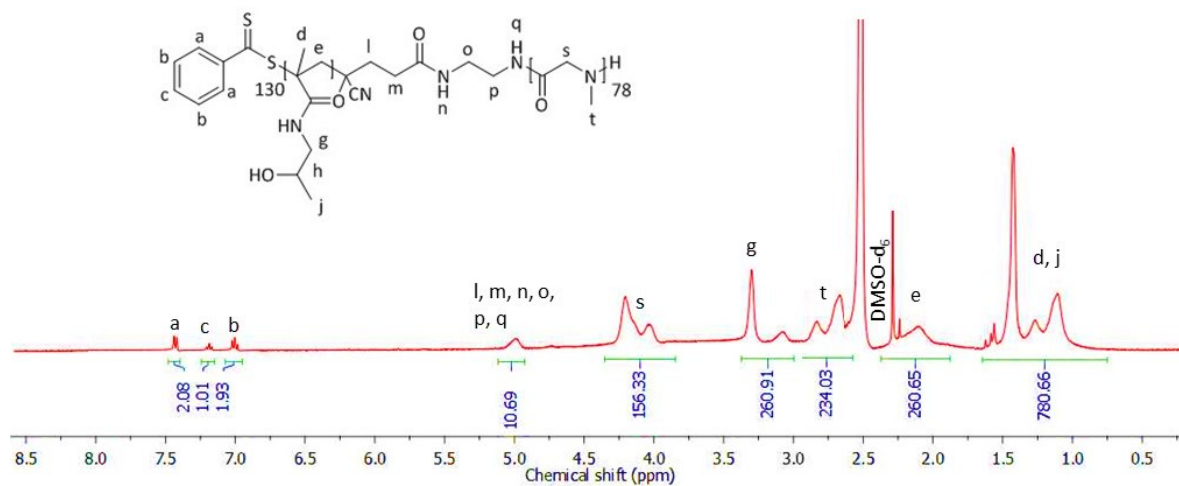

Figure 23.  $^1\text{H}$  NMR spectrum corresponding to  $\text{PSar}_{78}\text{-b-PHPMA}_{130}$ .  $\text{DMSO-d}_6$ .

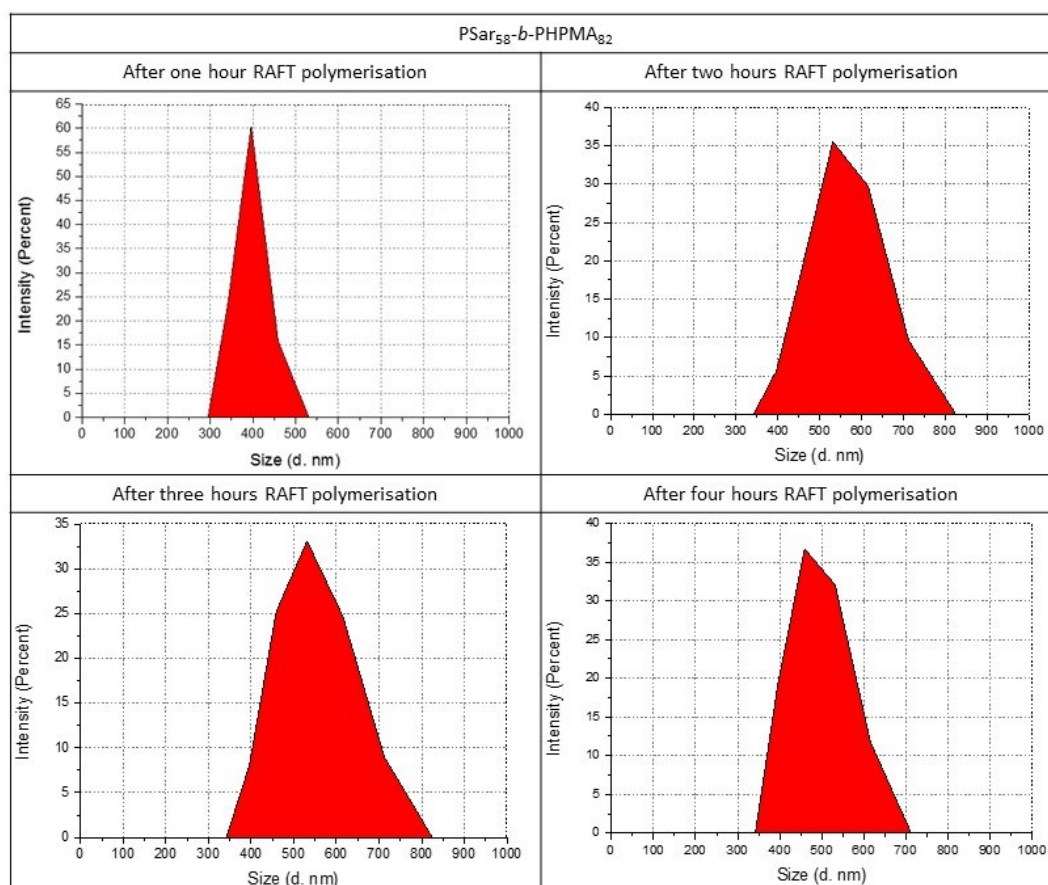

Figure S24. DLS distribution of  $\text{PSar}_{58}\text{-b-PHPMA}_{82}$  during four hours of polymerisation.

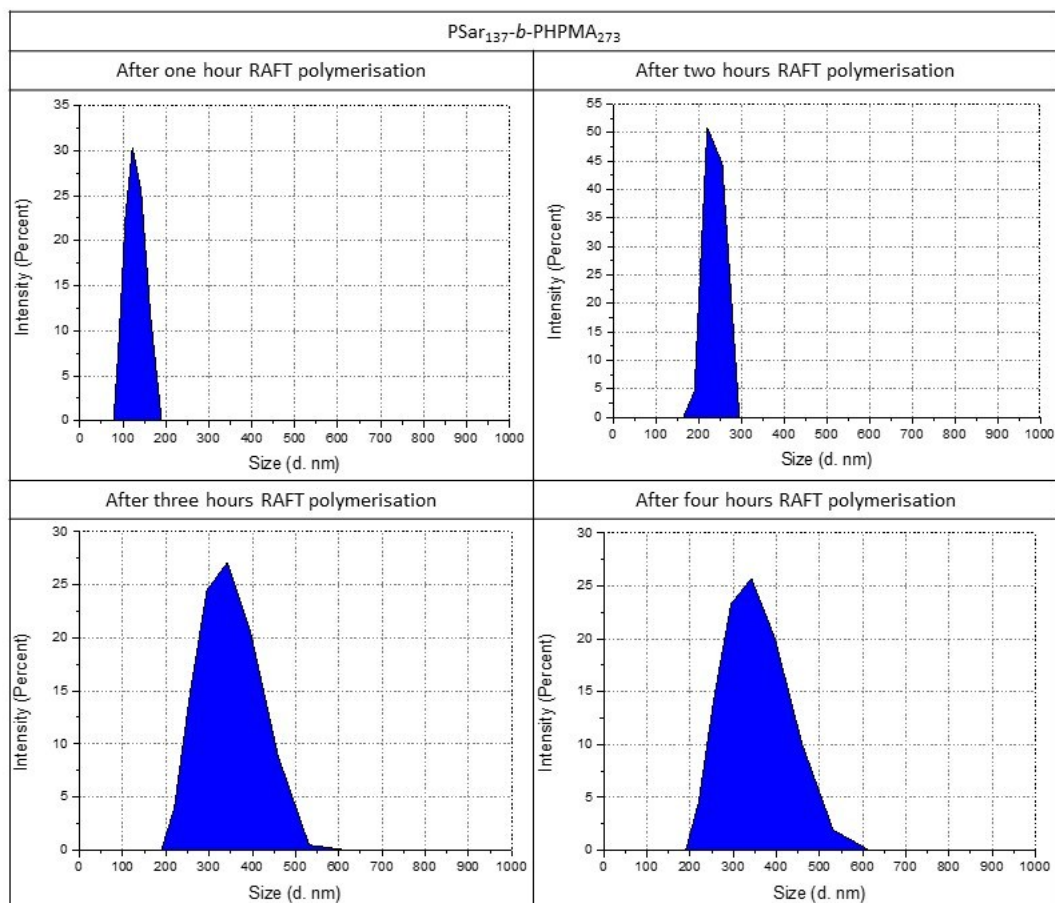

**Figure S25.** DLS distribution of PSar<sub>137</sub>-*b*-PHPMA<sub>273</sub> during four hours of polymerisation.

**Table S1.** Nanoparticle size and PDI values for nanoparticles formed during the polymerisation that yielded PSar<sub>78</sub>-*b*-PHPMA<sub>130</sub>.

|    | <b>PSar<sub>78</sub>-<i>b</i>-<br/>PHPMA<sub>130</sub></b> | <b>PDI</b> |
|----|------------------------------------------------------------|------------|
| 1h | 191                                                        | 0.431      |
| 2h | 233                                                        | 0.456      |
| 3h | 257                                                        | 0.510      |
| 4h | 297                                                        | 0.313      |

**Table S2.** A comparison of the polydispersity values of stored nanoparticles formed upon polymer precipitation at hourly intervals during the synthesis of PSar<sub>136</sub>-*b*-PHPMA<sub>14</sub> and PSar<sub>136</sub>-*b*-PHPMA<sub>53</sub>.

| Polymerisation Duration | PSar <sub>136</sub> - <i>b</i> -PHPMA <sub>14</sub><br>After 24 hours Storage | PSar <sub>136</sub> - <i>b</i> -PHPMA <sub>14</sub><br>After 14 days Storage | PSar <sub>136</sub> - <i>b</i> -PHPMA <sub>14</sub><br>After 21 days Storage |
|-------------------------|-------------------------------------------------------------------------------|------------------------------------------------------------------------------|------------------------------------------------------------------------------|
| 1 hour                  | 0.289                                                                         | 0.304                                                                        | 0.197                                                                        |
| 2 hours                 | 0.152                                                                         | 0.288                                                                        | 0.215                                                                        |
| 3 hours                 | 0.212                                                                         | 0.204                                                                        | 0.158                                                                        |
| 4 hours                 | 0.081                                                                         | 0.076                                                                        | 0.191                                                                        |
| Polymerisation Duration | PSar <sub>136</sub> - <i>b</i> -PHPMA <sub>53</sub><br>After 24 hours Storage | PSar <sub>136</sub> - <i>b</i> -PHPMA <sub>53</sub><br>After 14 days Storage | PSar <sub>136</sub> - <i>b</i> -PHPMA <sub>53</sub><br>After 21 days Storage |
| 1 hour                  | 0.166                                                                         | 0.168                                                                        | 0.175                                                                        |
| 2 hours                 | 0.258                                                                         | 0.184                                                                        | 0.282                                                                        |
| 3 hours                 | 0.206                                                                         | 0.205                                                                        | 0.220                                                                        |
| 4 hours                 | 0.080                                                                         | 0.082                                                                        | 0.089                                                                        |

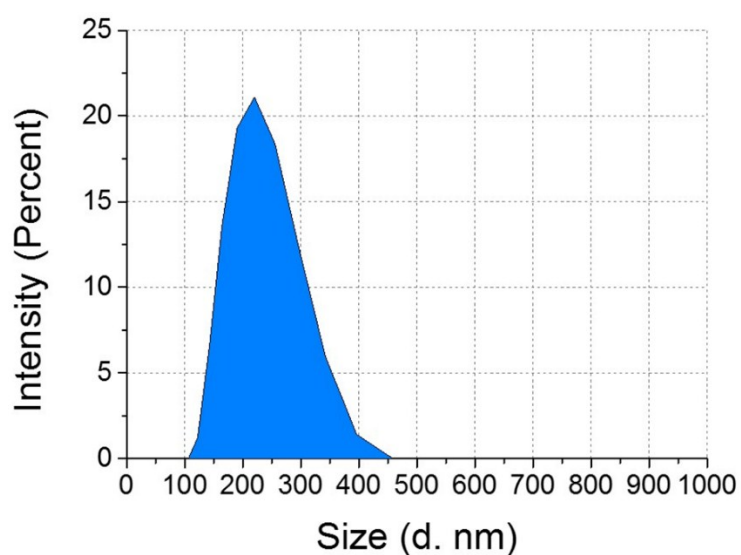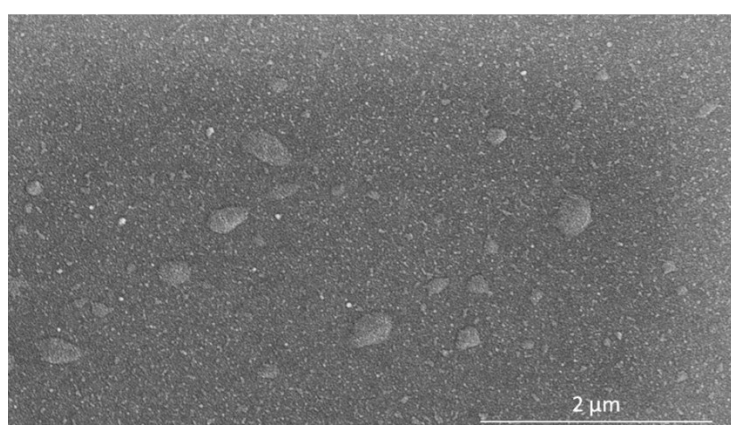

**Figure S26.** Particle size determination of PSar<sub>136</sub>-*b*-PHPMA<sub>14</sub> via DLS (*top*) and an SEM micrograph of PSar<sub>136</sub>-*b*-PHPMA<sub>14</sub> nanoparticles (*bottom*).

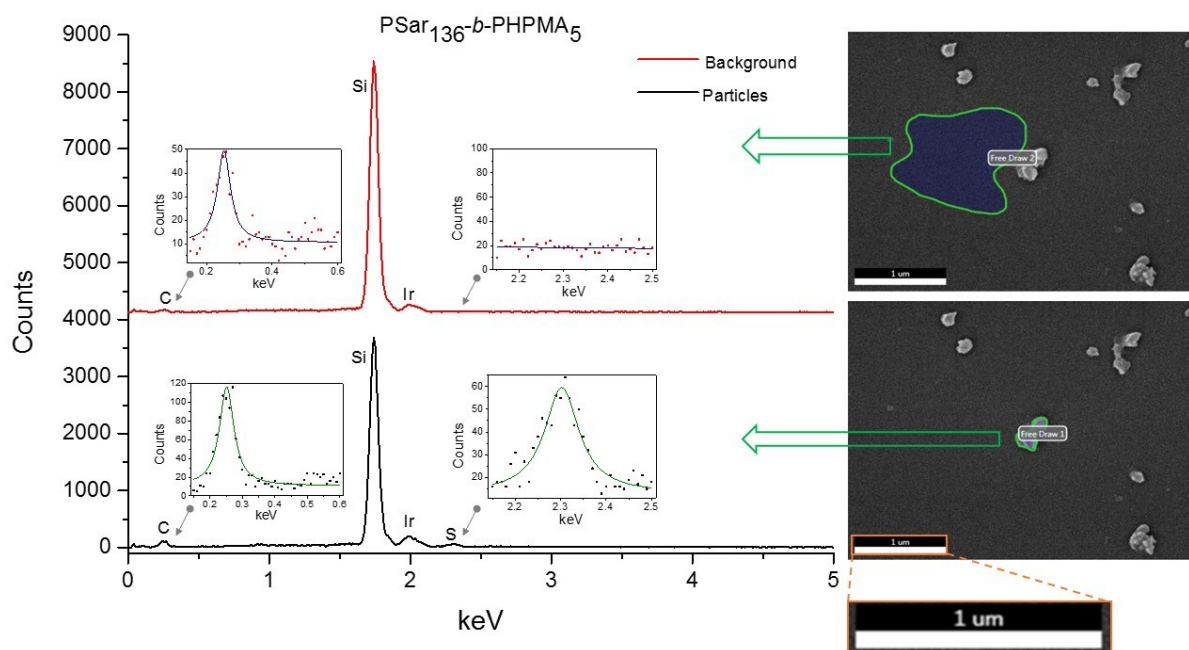

**Figure S27.** Energy dispersive X-ray analysis revealed the presence of sulfur only in areas of the SEM micrographs that contained the nanoparticles, and consequently the RAFT agent. Sulfur was not detected in the background. Scale bars represent 1  $\mu\text{m}$ .

### Dox Loading of Nanoparticles

3.0 mg of Dox was dissolved in 20  $\mu\text{L}$  of trimethylamine and 3.0 mL of chloroform, and stirred for 4 hours in dark (bright red solution). 2.0 mg of PSar<sub>136</sub>-*b*-PHPMA<sub>5</sub> was dissolved in 1.0 mL of DMF (colourless solution). The polymer solution was then added dropwise into 9.78 mL of PBS buffer or acetate buffer (pH 5) (colourless solution). Dox solution was added dropwise into the polymer solution to yield a final volume of 10.8 mL (bright red solution).

The Dox concentration for each sample was

$$\frac{3.0 \text{ mg}}{10.8 \text{ mL}} \approx 0.2778 \text{ mg mL}^{-1}$$

After six days dialysis for each sample, the concentration for PSar<sub>136</sub>-*b*-PHPMA<sub>5</sub> in PBS buffer was 0.272 mg mL<sup>-1</sup>, as measured by UV-vis spectroscopy.

For PSar<sub>136</sub>-*b*-PHPMA<sub>5</sub> in acetate buffer pH 5, the concentration was 0.269 mg mL<sup>-1</sup>.

Therefore, the percentage that was encapsulated by the polymer PSar<sub>136</sub>-*b*-PHPMA<sub>5</sub> was,

$$\text{At pH 7.4, } \frac{0.272}{0.2778} \times 100\% \approx 97.9\%$$

The mass of Dox in the above sample was  $0.272 \text{ mg mL}^{-1} \times 10.8 \text{ mL} \approx 2.94 \text{ mg}$

$$\text{At pH 5, } \frac{0.269}{0.2778} \times 100\% \approx 96.8\%$$

Mass of Dox in the above sample was  $0.269 \text{ mg mL}^{-1} \times 10.8 \text{ mL} \approx 2.91 \text{ mg}$

For PSar<sub>136</sub>-*b*-PHPMA<sub>21</sub>, after six days dialysis the Dox concentration of the sample prepared in PBS was  $0.270 \text{ mg mL}^{-1}$ , and the Dox concentration of the sample prepared in acetate buffer was  $0.268 \text{ mg mL}^{-1}$ .

Therefore, the percentage that was encapsulated by the polymer PSar<sub>136</sub>-*b*-PHPMA<sub>21</sub> was,

$$\text{At pH 7.4, } \frac{0.270}{0.2778} \times 100\% \approx 97.2 \%$$

Mass of Dox in the above sample was  $0.270 \text{ mg mL}^{-1} \times 10.8 \text{ mL} \approx 2.92 \text{ mg}$

$$\text{At pH 5, } \frac{0.268}{0.2778} \times 100\% \approx 96.5 \%$$

Mass of Dox in the above sample was  $0.268 \text{ mg mL}^{-1} \times 10.8 \text{ mL} \approx 2.89 \text{ mg}$

**Table S3.** Hydrodynamic diameters of Dox-loaded PSar<sub>136</sub>-*b*-PHPMA<sub>5</sub> particles maintained at 25 °C

|                | Size nm | PDI   | S.D.   |
|----------------|---------|-------|--------|
| After 24 hours | 161     | 0.240 | 6.598  |
| After 7 days   | 159     | 0.264 | 5.414  |
| After 14 days  | 167     | 0.167 | 12.349 |
| After 21 days  | 156     | 0.189 | 7.581  |

**Table S4.** Hydrodynamic diameters of Dox-loaded PSar<sub>136</sub>-*b*-PHPMA<sub>5</sub> particles maintained at 37 °C

|                | Size nm      | PDI   | S.D.  |
|----------------|--------------|-------|-------|
| After 24 hours | 130          | 0.389 | 4.916 |
| After 7 days   | 128 (97.8 %) | 0.316 | 6.497 |
|                | 27 (2.2%)    |       | 1.467 |
| After 14 days  | 125 (96.1 %) | 0.338 | 5.357 |
|                | 32 (3.9 %)   |       | 3.497 |
| After 21 days  | 129 (93.9 %) | 0.437 | 7.161 |
|                | 31 (6.1 %)   |       | 2.333 |

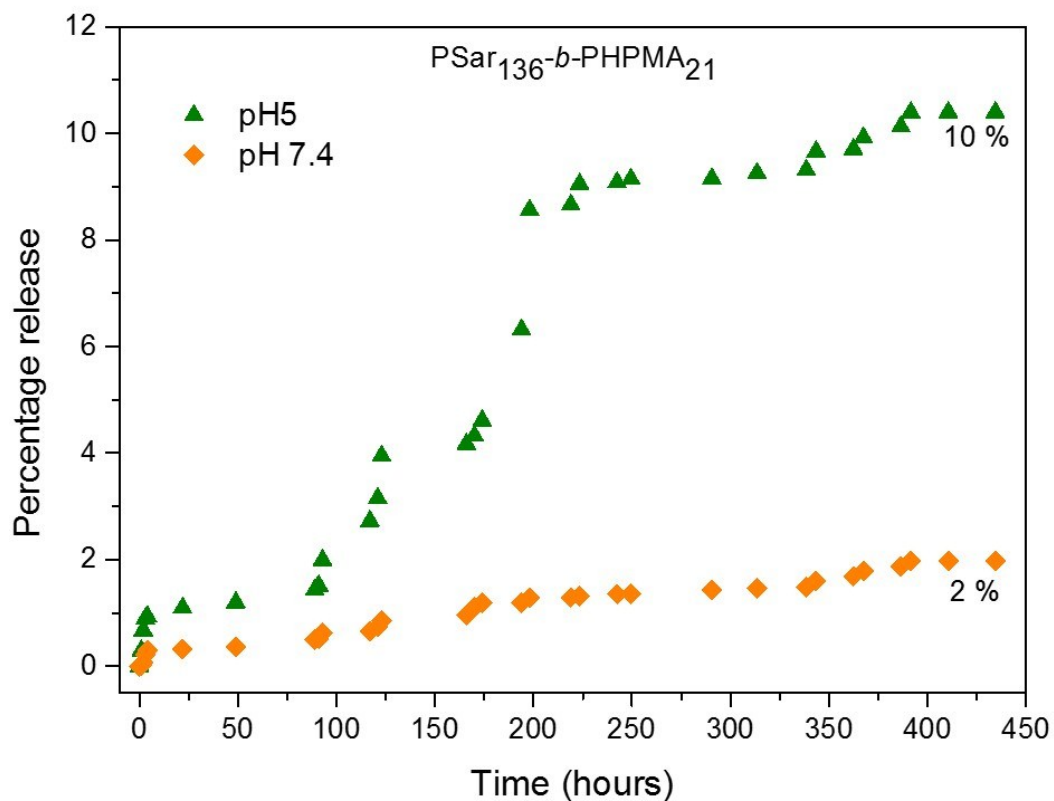

Figure S28. Doxorubicin release from PSar<sub>136</sub>-*b*-PHPMA<sub>21</sub> at pH 5 and pH 7.4.

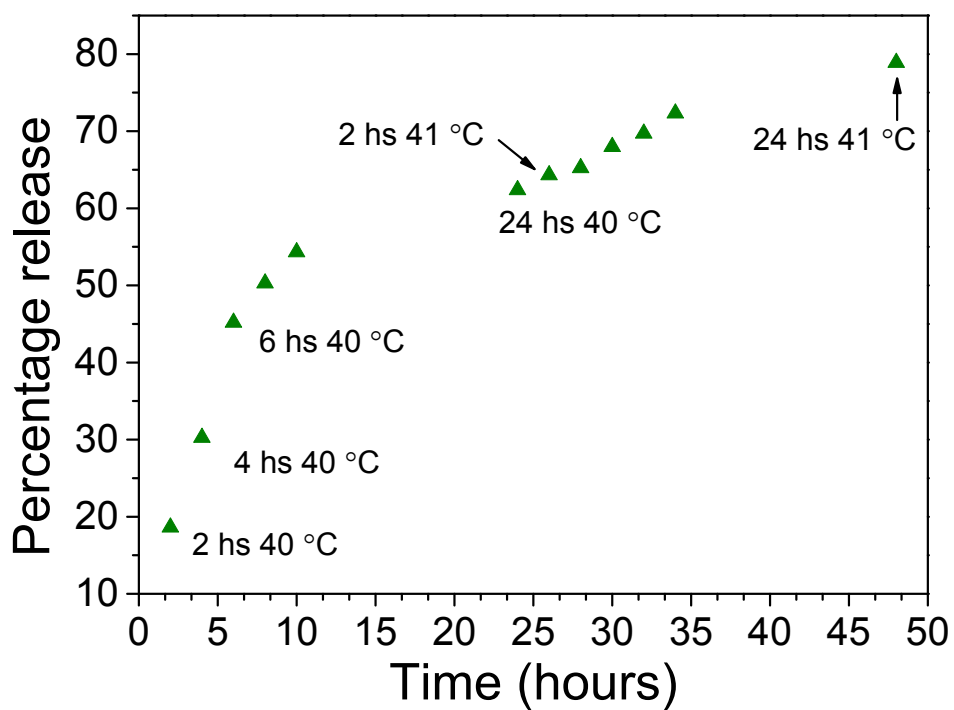

**Figure S29.** Detailed study of Dox release from PSar<sub>136</sub>-*b*-PHPMA<sub>5</sub> particles maintained in solution of 40 °C (24 hours) and then 41 °C (24 hours).

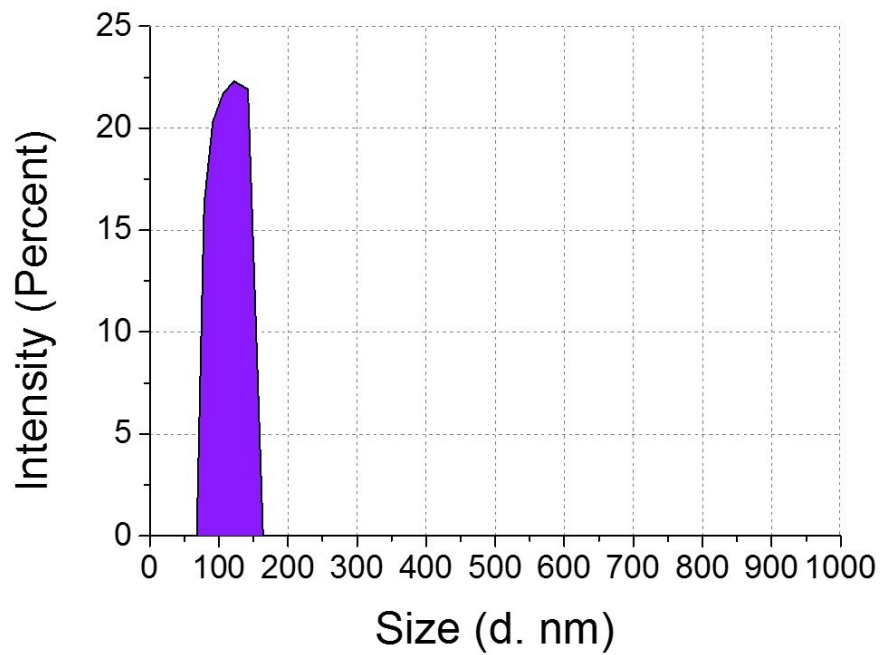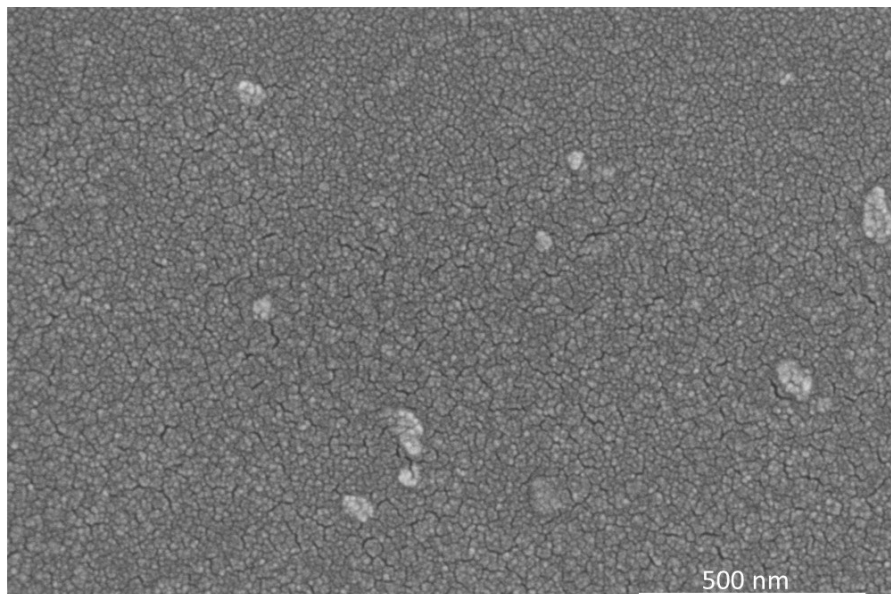

**Figure S30.** Particle size determination (*top*) and SEM images (*bottom*) corresponding to Dox loaded nanoparticles formed from PSar<sub>136</sub>-*b*-PHPMA<sub>14</sub> that had been subjected to heating to 50 °C for 24 hours.

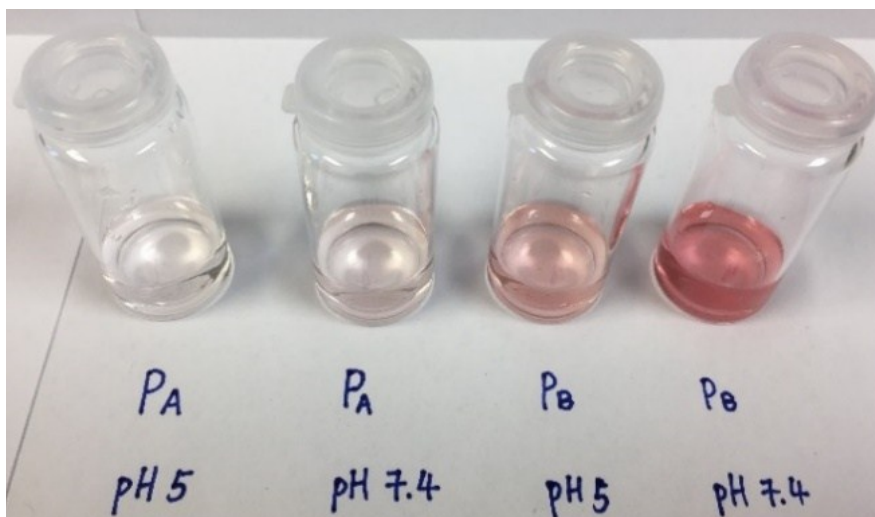

**Figure S31.** Image of finished release of Dox from Dox loaded polymers left in dialysis bags  
 $P_A$ :  $PSar_{136}-b-PPHMA_5$ ;  $P_B$ :  $PSar_{136}-b-PPHMA_{21}$

**Table S5.** The  $IC_{50}$  values obtained for the cell lines tested

| Cell line  | $IC_{50}$ Value ( $\mu\text{g/mL}$ ) |
|------------|--------------------------------------|
| MCF-7      | 0.001929                             |
| MDA-MB-231 | 0.4901                               |
| MDA-MB-453 | 0.1555                               |

**Table S6.** The % viability (and standard deviation) for each cell type tested compared to polymer nanoparticles, and the interpolated % viability value as obtained from  $IC_{50}$  curves.

| Cell line  | Dox conc used ( $\mu\text{g/mL}$ ) | Mean % viability | S.D. | Interpolated % viability |
|------------|------------------------------------|------------------|------|--------------------------|
| MCF-7      | 0.05                               | 66               | 11   | 13                       |
| MDA-MB-231 | 0.5                                | 61               | 8    | 45                       |
| MDA-MB-453 | 0.5                                | 27               | 9    | 8                        |



## Cytotoxicity assays

All cell lines were originally purchased from ECACC and tested negative for mycoplasma. All cell lines were STR profiled to confirm their identity. Cell lines were grown in DMEM (Invitrogen) supplemented with 10% FCS (Sigma). 5000 cells (MCF-7) or 10,000 cells (MDA-MB-231 and MDA-MB-453) were plated per well in a 96 well plate. After 24 hours serial dilutions of nanoparticle containing doxorubicin or equivalent polymer was added to the wells in quadruplicate. The 96 well plates were either placed at 37 °C or at 41 °C (sealed in a ziplock bag and placed in a water bath) for 51 minutes. A thermometer was used to verify that 11 minutes was required for 100  $\mu$ L volume of media to reach 41 °C. 40 minutes was allowed for the release of doxorubicin from the polymer. Following this, all plates were placed in a humidified incubator at 37 °C, 5% CO<sub>2</sub> for a further 72 hours. MTT was then added to each well (at a final concentration of 0.5 mg/mL) and the cells incubated for 3 hours before the removal of the media. The crystals were dissolved in 150  $\mu$ L of DMSO and the absorbance was read on a plate-reader at 620 nm. The experiment was repeated 3 times in total and the results were fitted with a four parameter log inhibition curve using GraphPad Prism version 5 to generate an IC<sub>50</sub> value.

## Calibration Curve for Dox Release

0.003 g of doxorubicin hydrochloride was dissolved in 20  $\mu$ L of triethylamine and 3.0 mL of chloroform. Then the solution was mixed with PBS buffer (pH 7.4) or acetate buffer (pH 5) to get desired concentrations in the table below. The absorbance were measured via Lambda 35 UV/VIS Spectrometer from PerkinElmer. Very small concentrations were chosen in order to get doxorubicin dissolved fully.

**Table S7.** Absorbance of doxorubicin with different concentrations

| Concentration of doxorubicin at pH 7.4 (mg mL <sup>-1</sup> ) | Absorbance at 498 nm | Concentration of doxorubicin at pH 5 (mg mL <sup>-1</sup> ) | Absorbance at 502 nm |
|---------------------------------------------------------------|----------------------|-------------------------------------------------------------|----------------------|
| 0.01                                                          | 0.07282              | 0.01                                                        | 0.07687              |
| 0.005                                                         | 0.03569              | 0.005                                                       | 0.04287              |
| 0.003                                                         | 0.02024              | 0.003                                                       | 0.02648              |
| 0.001                                                         | 0.00388              | 0.001                                                       | 0.00689              |
| --                                                            | --                   | 0.0005                                                      | 0.00371              |

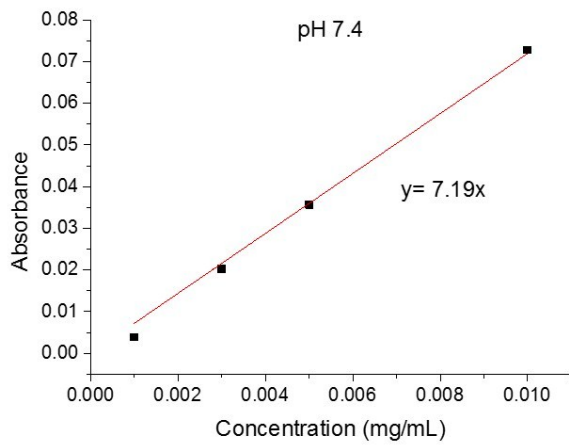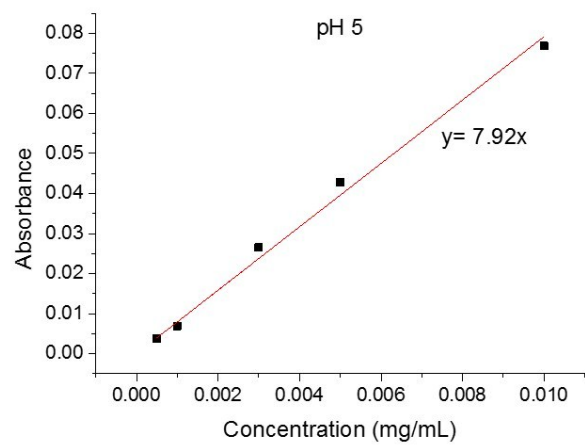

**Figure S32.** Calibration curve and best fit line of doxorubicin free base with different concentrations
